# Supplementary material
Source: PubMed Central journal article supplement (PMC6622408)
Supplement: ASN.2018100971SupplementaryData1.pdf [file ASN.2018100971SupplementaryData1.pdf]

## Supplemental Material Table of Contents:

1. Supplemental Table 1: Percentage of Levels of Kidney Function, Demographic Characteristics, and Comorbidities in the General U.S. Adult Population in 2007-2014 (vs. 1999-2006), NHANES

2. Supplemental Table 2: Prevalence of Demographic Characteristics and Comorbidities in the U.S. Adult Population with Impaired Kidney Function by Era, NHANES 1999-2014

3. Supplemental Figure 1: Interactive, online only version of Figure 1.

Supplemental Table 1. Percentage of Levels of Kidney Function, Demographic Characteristics, and Comorbidities in the General U.S. Adult Population in 2007-2014 (vs. 1999-2006), NHANES

|                                                          | Percent of sample with characteristic (SE) | Percent of sample from 2007-2014 (SE) | P-value* | Adjusted Odds Ratio (95% CI)† | P-value‡ |
|----------------------------------------------------------|--------------------------------------------|---------------------------------------|----------|-------------------------------|----------|
| All                                                      | -                                          | 52.5 (1.0)                            | -        | -                             | -        |
| eGFR, mL/min/1.73m <sup>2</sup> / ACR, mg/g <sup>‡</sup> |                                            |                                       | 0.525    |                               |          |
| eGFR ≥ 60, ACR < 30 (no CKD)                             | 85.9 (0.3)                                 | 52.4 (1.0)                            |          | 1 [ref]                       |          |
| eGFR ≥ 60, ACR ≥ 30                                      | 7.4 (0.2)                                  | 52.0 (1.4)                            |          | 0.94 (0.84-1.04)              | 0.227    |
| eGFR 30-59, ACR < 30                                     | 4.5 (0.2)                                  | 53.8 (2.2)                            |          | 0.98 (0.86-1.12)              | 0.796    |
| eGFR 30-59, ACR ≥ 30                                     | 1.6 (0.1)                                  | 52.3 (2.7)                            |          | 0.90 (0.73-1.11)              | 0.337    |
| eGFR < 30, ACR < 30                                      | 0.2 (0)                                    | 56.2 (6.5)                            |          | 1.06 (0.64-1.78)              | 0.811    |
| eGFR < 30, ACR ≥ 30                                      | 0.4 (0)                                    | 61.2 (3.7)                            |          | 1.29 (0.94-1.77)              | 0.122    |
| Age, years                                               |                                            |                                       | 0.002    |                               |          |
| 20-39                                                    | 38.1 (0.5)                                 | 50.3 (1.0)                            |          | 1 [ref]                       |          |
| 40-64                                                    | 45.2 (0.4)                                 | 53.5 (1.3)                            |          | 1.17 (1.07-1.27)              | < 0.001  |
| ≥ 65                                                     | 16.7 (0.3)                                 | 54.7 (1.5)                            |          | 1.25 (1.12-1.40)              | < 0.001  |
| Sex                                                      |                                            |                                       | 0.643    |                               |          |
| Male                                                     | 48.1 (0.2)                                 | 52.6 (1.0)                            |          | 1 [ref]                       |          |
| Female                                                   | 51.9 (0.2)                                 | 52.4 (1.0)                            |          | 0.99 (0.95-1.02)              | 0.492    |
| Race/ethnicity                                           |                                            |                                       | 0.068    |                               |          |
| Non-Hispanic white                                       | 70.0 (1.1)                                 | 51.1 (1.7)                            |          | 1 [ref]                       |          |
| Non-Hispanic black                                       | 10.7 (0.6)                                 | 52.4 (2.4)                            |          | 1.08 (0.83-1.40)              | 0.582    |
| Hispanic                                                 | 13.3 (0.9)                                 | 55.2 (2.8)                            |          | 1.23 (0.90-1.67)              | 0.193    |
| Other                                                    | 6.0 (0.3)                                  | 62.2 (2.4)                            |          | 1.61 (1.27-2.03)              | < 0.001  |
| Insurance status                                         |                                            |                                       | 0.195    |                               |          |
| Insured                                                  | 84.2 (0.3)                                 | 52.7 (1.1)                            |          | 1 [ref]                       |          |
| Uninsured                                                | 15.8 (0.3)                                 | 51.3 (1.2)                            |          | 0.94 (0.87-1.02)              | 0.152    |
| Received medical care in last year                       |                                            |                                       | 0.212    |                               |          |
| Yes                                                      | 84.3 (0.3)                                 | 52.7 (1.1)                            |          | 1 [ref]                       |          |
| No                                                       | 15.7 (0.3)                                 | 51.3 (1.2)                            |          | 0.94 (0.87-1.02)              | 0.168    |
| Income status                                            |                                            |                                       | 0.013    |                               |          |
| Above poverty level                                      | 86.5 (0.4)                                 | 51.9 (1.1)                            |          | 1 [ref]                       |          |
| Below or equal to poverty level                          | 13.5 (0.4)                                 | 56.5 (1.7)                            |          | 1.20 (1.03-1.39)              | 0.018    |
| High school graduation                                   |                                            |                                       | 0.066    |                               |          |
| No                                                       | 18.5 (0.5)                                 | 50.0 (1.5)                            |          | 1 [ref]                       |          |
| Yes                                                      | 81.5 (0.5)                                 | 53.0 (1.1)                            |          | 1.22 (1.06-1.41)              | 0.008    |

|                                          |            |            |         |                  |         |
|------------------------------------------|------------|------------|---------|------------------|---------|
| Body mass index, kg/m <sup>2</sup>       |            |            | < 0.001 |                  |         |
| < 30                                     | 66.2 (0.4) | 51.3 (1.0) |         | 1 [ref]          |         |
| ≥ 30                                     | 33.8 (0.4) | 55.3 (1.3) |         | 1.18 (1.09-1.28) | < 0.001 |
| Diabetes mellitus§                       |            |            | < 0.001 |                  |         |
| No: SR-, A <sub>1c</sub> < 6.5%          | 90 (0.2)   | 51.8 (1.0) |         | 1 [ref]          |         |
| Yes: SR-, A <sub>1c</sub> ≥ 6.5%         | 2.0 (0.1)  | 58.8 (2.4) |         | 1.22 (1.01-1.48) | 0.043   |
| Yes: SR+, A <sub>1c</sub> < 6.5%         | 2.9 (0.1)  | 56.9 (2.4) |         | 1.16 (0.96-1.39) | 0.128   |
| Yes: SR+, A <sub>1c</sub> ≥ 6.5%         | 5.2 (0.2)  | 58.9 (1.9) |         | 1.24 (1.09-1.42) | 0.002   |
| Hypertension#                            |            |            | < 0.001 |                  |         |
| No: SR-, BP < 140/90                     | 64.5 (0.5) | 54.6 (1.1) |         | 1 [ref]          |         |
| Yes: SR-, BP ≥ 140/90                    | 6.1 (0.2)  | 46.9 (2.0) |         | 0.69 (0.59-0.82) | < 0.001 |
| Yes: SR+, BP < 140/90, no BP medication  | 4.1 (0.2)  | 53.4 (2.3) |         | 0.95 (0.80-1.13) | 0.595   |
| Yes: SR+, BP ≥ 140/90, no BP medication  | 1.2 (0.1)  | 48.0 (3.5) |         | 0.74 (0.56-0.98) | 0.038   |
| Yes: SR+, BP < 140/90, ≥ 1 BP medication | 16.0 (0.4) | 64.1 (1.6) |         | 1.42 (1.28-1.57) | < 0.001 |
| Yes: SR+, BP ≥ 140/90, ≥ 1 BP medication | 8.1 (0.2)  | 53.7 (1.8) |         | 0.90 (0.79-1.02) | 0.115   |
| Cardiac failure                          |            |            | 0.489   |                  |         |
| No                                       | 97.7 (0.1) | 52.5 (1.0) |         | 1 [ref]          |         |
| Yes                                      | 2.3 (0.1)  | 54.0 (2.5) |         | 1.00 (0.84-1.18) | 0.984   |
| Prior myocardial infarction              |            |            | 0.328   |                  |         |
| No                                       | 96.7 (0.1) | 52.6 (1.0) |         | 1 [ref]          |         |
| Yes                                      | 3.3 (0.1)  | 50.7 (2.4) |         | 0.87 (0.75-1.00) | 0.045   |

NHANES: National Health and Nutrition Examination Survey

SE: standard error; CI: confidence interval

\* Chi-square test

† Logistic regression, adjusted for age, sex, and race/ethnicity

‡ eGFR/ACR: estimated glomerular filtration rate (eGFR), by the CKD-EPI equation, and albumin-creatinine ratio (ACR), normal kidney function if eGFR ≥ 60 mL/min/1.73m<sup>2</sup> and ACR < 30 mg/g

§ Diabetes mellitus status defined by self-reported history (SR-: no by self-report, SR+: yes by self-report) and hemoglobin A<sub>1c</sub> (A<sub>1c</sub>)

# Hypertension status defined by self-reported history (SR-: no by self-report, SR+: yes by self-report) and resting blood pressure (BP, in mmHg), further characterized by use of any self-described antihypertensive medication (BP medication) among those SR+

Supplemental Table 2. Prevalence of Demographic Characteristics and Comorbidities in the U.S. Adult Population with Impaired Kidney Function\* by Era, NHANES 1999-2014

|                                          | Percent of sample with characteristic (Standard error) |            |            |            |
|------------------------------------------|--------------------------------------------------------|------------|------------|------------|
|                                          | 1999-2002                                              | 2003-2006  | 2007-2010  | 2011-2014  |
| Age, years                               |                                                        |            |            |            |
| 20-39                                    | 18.4 (2.0)                                             | 14.8 (1.4) | 15.0 (1.0) | 15.9 (1.1) |
| 40-64                                    | 34.1 (1.6)                                             | 34.9 (1.4) | 33.3 (1.3) | 37.1 (1.6) |
| ≥ 65                                     | 47.5 (1.7)                                             | 50.4 (1.9) | 51.7 (1.5) | 47.0 (1.6) |
| Sex                                      |                                                        |            |            |            |
| Male                                     | 41.7 (1.3)                                             | 43.5 (1.6) | 42.1 (1.3) | 42.5 (1.7) |
| Female                                   | 58.3 (1.3)                                             | 56.5 (1.6) | 57.9 (1.3) | 57.5 (1.7) |
| Race/ethnicity                           |                                                        |            |            |            |
| Non-Hispanic white                       | 71.1 (2.4)                                             | 72.4 (2.7) | 71.6 (2.7) | 68.7 (2.5) |
| Non-Hispanic black                       | 11.3 (1.5)                                             | 11.8 (1.7) | 11.8 (1.3) | 12.5 (1.6) |
| Hispanic                                 | 12.4 (2.5)                                             | 9.7 (1.5)  | 11.7 (1.9) | 12.2 (1.7) |
| Other                                    | 5.2 (1.4)                                              | 6.0 (1.0)  | 4.9 (1.0)  | 6.6 (0.8)  |
| Insurance status                         |                                                        |            |            |            |
| Insured                                  | 89.8 (1.1)                                             | 91.6 (1.0) | 92.0 (0.8) | 91.9 (0.6) |
| Uninsured                                | 10.2 (1.1)                                             | 8.4 (1.0)  | 8.0 (0.8)  | 8.1 (0.6)  |
| Received medical care in last year       |                                                        |            |            |            |
| Yes                                      | 90.0 (1.1)                                             | 91.8 (1.0) | 92.0 (0.8) | 92.0 (0.6) |
| No                                       | 10.0 (1.1)                                             | 8.2 (1.0)  | 8.0 (0.8)  | 8.0 (0.6)  |
| Income status                            |                                                        |            |            |            |
| Above poverty level                      | 81.8 (2.2)                                             | 88.2 (0.9) | 85.4 (1.1) | 81.9 (1.2) |
| Below or equal to poverty level          | 18.2 (2.2)                                             | 11.8 (0.9) | 14.6 (1.1) | 18.1 (1.2) |
| High school graduation                   |                                                        |            |            |            |
| No                                       | 33.3 (1.7)                                             | 25.6 (1.4) | 27.0 (1.6) | 22.8 (1.6) |
| Yes                                      | 66.7 (1.7)                                             | 74.4 (1.4) | 73.0 (1.6) | 77.2 (1.6) |
| Body mass index, kg/m <sup>2</sup>       |                                                        |            |            |            |
| < 30                                     | 61.6 (2.3)                                             | 60.3 (1.6) | 57.7 (1.5) | 55.9 (1.6) |
| ≥ 30                                     | 38.4 (2.3)                                             | 39.7 (1.6) | 42.3 (1.5) | 44.1 (1.6) |
| Diabetes mellitus <sup>†</sup>           |                                                        |            |            |            |
| No: SR-, A <sub>1c</sub> < 6.5%          | 77.7 (1.6)                                             | 72.5 (1.9) | 70.3 (1.5) | 70.4 (1.4) |
| Yes: SR-, A <sub>1c</sub> ≥ 6.5%         | 4.2 (0.8)                                              | 3.9 (0.7)  | 4.7 (0.6)  | 4.0 (0.6)  |
| Yes: SR+, A <sub>1c</sub> < 6.5%         | 5.1 (0.7)                                              | 8.6 (1.1)  | 8.1 (0.8)  | 6.8 (0.8)  |
| Yes: SR+, A <sub>1c</sub> ≥ 6.5%         | 13.0 (1.1)                                             | 15.0 (1.6) | 16.8 (1.4) | 18.8 (1.2) |
| Hypertension <sup>‡</sup>                |                                                        |            |            |            |
| No: SR-, BP < 140/90                     | 36.5 (1.8)                                             | 31.0 (1.6) | 33.2 (1.7) | 33.6 (1.6) |
| Yes: SR-, BP ≥ 140/90                    | 13.6 (0.9)                                             | 10.8 (1.0) | 9.0 (0.7)  | 5.9 (0.8)  |
| Yes: SR+, BP < 140/90, no BP medication  | 2.6 (0.6)                                              | 3.2 (0.7)  | 2.0 (0.4)  | 1.7 (0.4)  |
| Yes: SR+, BP ≥ 140/90, no BP medication  | 2.3 (0.6)                                              | 1.6 (0.4)  | 1.0 (0.3)  | 1.5 (0.4)  |
| Yes: SR+, BP < 140/90, ≥ 1 BP medication | 19.3 (1.3)                                             | 27.7 (1.9) | 32.6 (1.3) | 35.2 (1.3) |
| Yes: SR+, BP ≥ 140/90, ≥ 1 BP medication | 25.8 (1.5)                                             | 25.6 (1.4) | 22.2 (1.0) | 22.1 (1.2) |
| Cardiac failure                          |                                                        |            |            |            |
| No                                       | 93.1 (0.8)                                             | 91.1 (0.9) | 92.6 (0.9) | 90.5 (0.9) |
| Yes                                      | 6.9 (0.8)                                              | 8.9 (0.9)  | 7.4 (0.9)  | 9.5 (0.9)  |
| Prior myocardial infarction              |                                                        |            |            |            |
| No                                       | 91.4 (1.0)                                             | 88.5 (1.0) | 91.7 (0.6) | 90.5 (0.9) |
| Yes                                      | 8.6 (1.0)                                              | 11.5 (1.0) | 8.3 (0.6)  | 9.5 (0.9)  |

NHANES: National Health and Nutrition Examination Survey

\* Impaired kidney function defined by estimated glomerular filtration rate  $< 60 \text{ mL/min/1.73m}^2$ , by the CKD-EPI equation, or albumin-creatinine ratio  $\geq 30 \text{ mg/g}$

† Diabetes mellitus status defined by self-reported history (SR-: no by self-report, SR+: yes by self-report) and hemoglobin A<sub>1c</sub> (A<sub>1c</sub>)

‡ Hypertension status defined by self-reported history (SR-: no by self-report, SR+: yes by self-report) and resting blood pressure (BP, in mmHg), further characterized by use of any self-described antihypertensive medication (BP medication) among those SR+
