# Supplementary material
Source: PubMed Central journal article supplement (PMC6622408)
Supplement: ASN.2018100971SupplementaryData2.pdf [file ASN.2018100971SupplementaryData2.pdf]

Instructions for interactive HTML version of Figure: Copy the following code into a text-editor (such as *Notepad* for PC, or *TextEdit* for Mac) and save a file with the extension .html (such as *Figure.html*). Hover over individual points to obtain associated 95% confidence intervals and *P*-Values.

#### Supplemental Figure Legend:

Supplemental Figure 1: Adjusted odds ratio with 95% confidence interval (CI) and *P*-value (hover over point-estimate) of angiotensin converting enzyme inhibitor or angiotensin II receptor blocker (ACE/ARB) use in the U.S. adult population with impaired kidney function (estimated glomerular filtration rate [eGFR] < 60 mL/min/1.73m<sup>2</sup>, by the CKD-EPI equation, or albumin-creatinine ratio [ACR] ≥ 30 mg/g) by era, compared with 1999-2002, in subgroups defined by levels of kidney function, age, sex, race/ethnicity, presence of diabetes mellitus (self-report or hemoglobin A<sub>1c</sub> ≥ 6.5%), and presence of cardiac failure. Odds ratios adjusted for age, sex, and race/ethnicity.

HTML Code (copy below here):

```
<!DOCTYPE html>
```

```
<meta charset="utf-8">
```

```
<style>
```

```
.axis text {
```

```
font: 12px verdana;
```

```
}
```

```
.Nada {  
  
fill:green ;  
  
opacity:0.0;  
  
}
```

```
.Two {  
  
fill:black ;  
  
opacity:1.0;  
  
}
```

```
.Three {  
  
fill:gray ;  
  
opacity:1.0;  
  
}
```

```
.Four {
```

```
fill:lightgray ;
```

```
opacity:1.0;
```

```
}
```

```
.axis path,
```

```
.axis line {
```

```
fill: none;
```

```
stroke: #000;
```

```
shape-rendering: crispEdges;
```

```
}
```

```
</style>
```

```
<body>
```

```
<script src="http://d3js.org/d3.v3.min.js"></script>
```

<script>

```
var dataset = [
```

```
["",,,, "Nada", "", ],
```

```
["",,,, "Nada", "", ],
```

```
["",,,, "Nada", "", ],
```

```
["eGFR<60 or ACR>=30",1.41,1.14,1.74,"Two","0.002",1],
```

```
["eGFR<60 or ACR>=30",1.84,1.48,2.28,"Three","<0.001",2],
```

["eGFR<60 or ACR>=30",2.02,1.61,2.53,"Four", "<0.001",3],

["eGFR < 60",1.35,1.07,1.71,"Two", "0.013",1],

["eGFR < 60",1.79,1.37,2.33,"Three", "<0.001",2],

["eGFR < 60",2.02,1.52,2.69,"Four", "<0.001",3],

["ACR >= 30",1.55,1.19,2.03,"Two", "0.002",1],

["ACR >= 30",1.84,1.43,2.36,"Three", "<0.001",2],

["ACR >= 30",2.10,1.60,2.76,"Four", "<0.001",3],

["Age < 40",1.38,0.58,3.29,"Two", "0.467",1],

["Age < 40",1.94,0.69,5.44,"Three", "0.209",2],

["Age < 40",0.95,0.43,2.12,"Four", "0.901",3],

["Age 40-64",1.25,0.85,1.86,"Two", "0.259",1],

["Age 40-64",1.50,0.99,2.29,"Three", "0.061",2],

["Age 40-64",1.78,1.15,2.76,"Four", "0.011",3],

["Age >= 65",1.51,1.19,1.92,"Two", "<0.001",1],

["Age >= 65",2.04,1.60,2.60,"Three", "<0.001",2],

["Age >= 65",2.30,1.72,3.06,"Four", "<0.001",3],

["Male",1.44,1.07,1.92,"Two", "0.016",1],

["Male",2.14,1.62,2.82,"Three", "<0.001",2],

["Male",2.06,1.54,2.76,"Four", "<0.001",3],

["Female",1.39,1.04,1.86,"Two", "0.029",1],

["Female",1.64,1.23,2.19,"Three", "0.001",2],

["Female",2.00,1.48,2.70,"Four", "<0.001",3],

["Non-Hispanic white",1.50,1.18,1.91,"Two", "0.001",1],

["Non-Hispanic white",1.84,1.42,2.38,"Three", "<0.001",2],

["Non-Hispanic white",2.04,1.57,2.66,"Four", "<0.001",3],

["Non-Hispanic black",1.03,0.71,1.50,"Two", "0.878",1],

["Non-Hispanic black",1.78,1.16,2.73,"Three", "0.010",2],

["Non-Hispanic black",1.72,1.24,2.39,"Four", "0.002",3],

["Hispanic",1.14,0.50,2.61,"Two", "0.763",1],

["Hispanic",1.45,0.83,2.53,"Three", "0.199",2],

["Hispanic",1.67,0.89,3.12,"Four","0.111",3],

["Diabetes",1.91,1.34,2.73,"Two","<0.001",1],

["Diabetes",2.27,1.61,3.20,"Three","<0.001",2],

["Diabetes",2.11,1.45,3.06,"Four","<0.001",3],

["Cardiac failure",1.29,0.68,2.46,"Two","0.437",1],

["Cardiac failure",1.36,0.72,2.58,"Three","0.344",2],

["Cardiac failure",1.44,0.78,2.68,"Four","0.251",3]

];

var margin = {top: 300, right: 100, bottom: 100, left: 150},

width = 400 - margin.left - margin.right,

height = 700 - margin.top - margin.bottom,

axisOffset = 20,

ciThickness = 1,

referenceLineWidth = 1,

xAxisLabel = 'OR (95% CI) of ACE/ARB (Vs. 1999-2002)',

xAxisLabelFont = 'verdana',

xAxisLabelFontSize = 12,

xAxisLabelOffset = 40,

xAxisNumTicks = 4,

legendXpropW = 0.1,

legendYpropH = -0.25,

gapLegendElements = 10,

labelLegend0 = '2003-06',

labelLegend1 = '2007-10',



```
labelLegend2 = '2011-14',
```

```
circleSizeGraph = 3,
```

```
circleSizeLegend = 3
```

```
;
```

```
var y = d3.scale.ordinal()
```

```
    .domain([
```

```
    "",
```

```
    "eGFR<60 or ACR>=30",
```

```
    "eGFR < 60",
```

```
    "ACR >= 30",
```

```
    "Age < 40",
```

```
    "Age 40-64",
```

```
    "Age >= 65",
```

"Male",

"Female",

"Non-Hispanic white",

"Non-Hispanic black",

"Hispanic",

"Diabetes",

"Cardiac failure"

])

.rangePoints([0, height]);

var x = d3.scale.linear()

.domain([0, 5])

// .domain([0, d3.max(dataset, function(d) {return d[3];}))])

```
.range([axisOffset,width]); //20 is axis offset
```

```
var xAxis = d3.svg.axis()
```

```
.scale(x)
```

```
.orient("bottom")
```

```
.ticks(xAxisNumTicks)
```

```
;
```

```
var yAxis = d3.svg.axis()
```

```
.scale(y)
```

```
.orient("left");
```

```
var svg = d3.select("body").append("svg")
```

```
.attr("width", width + margin.left + margin.right)
```

```
.attr("height", height + margin.top + margin.bottom)
```

```
.append("g")
```

```
.attr("transform", "translate(" + margin.left + "," + margin.top + ")");
```

```
svg.append("g")
```

```
.attr("class", "x axis")
```

```
.attr("transform", "translate( 0," + (height + axisOffset) + ")")
```

```
.call(xAxis);
```

```
svg.append("g")
```

```
.attr("class", "y axis")
```

```
.call(yAxis);
```

```
svg.append("rect")
```

```
.attr("x", x(1) - 0.5*referenceLineWidth)
```

```
.attr("y", y(0) + axisOffset)
```

```
.attr("height", height + axisOffset)
```

```
.attr("width",referenceLineWidth)
```

```
.attr("fill","lightgray");
```

```
svg.selectAll("rect")
```

```
.data(dataset)
```

```
.enter()
```

```
.append("rect")
```

```
.attr("x", function(d) {
```

```
    return x(d[2]);
```

```
})
```

```
.attr("y", function(d) {  
  
    return y(d[0]) + 6*(2 - d[6]) - ciThickness/2;  
  
})  
  
.attr("width", function(d) {  
  
    return x(d[3]) - x(d[2]);  
  
})  
  
.attr("height", ciThickness)  
  
.attr("class", function(d) {  
  
    return d[4];  
  
});
```

```
svg.selectAll("circle")

.data(dataset)

.enter()

.append("circle")

.attr("cx", function(d) {

    return x(d[1]);

})

.attr("cy", function(d) {

    return y(d[0]) + 6*(2 - d[6]);

})

.attr("r", circleSizeGraph)

.attr("class", function(d) {

    return d[4];

})
```

```
.append("title")

.text(function(d) {

    return d[0] + ": AOR for Era " + d[4] + ' is ' + d[1] + " (95% CI " + d[2] + " to " + d[3] + ") Vs.  
Era One, P-Value " + d[5];

});
```

```
svg.selectAll("rect")

.data(dataset)

.enter()

.append("rect")

.attr("x", function(d) {

    return x(d[2]);

})

.attr("y", function(d) {

    return y(d[0]) - (ciThickness/2);
```



```
)
```

```
.attr("width", function(d) {
```

```
    return x(d[3]) - x(d[2]);
```

```
)
```

```
.attr("height", ciThickness)
```

```
.attr("class", "rectangle")
```

```
.attr("class", function(d) {
```

```
    return d[4];
```

```
});
```

```
svg.append("text")
```

```
.attr("text-anchor", "middle")

.attr("x",x(1))

.attr("y", height + axisOffset + xAxisLabelOffset)

.attr("font-size", xAxisLabelFontSize)

.attr("font-family", xAxisLabelFont)

.text(xAxisLabel);
```

```
//Legend section
```

```
//Group 0
```

```
svg.append("circle")

.attr("cx", legendXpropW*width)

.attr("cy", 0*gapLegendElements + legendYpropH*height)

.attr("r", circleSizeLegend)
```

```
.attr("class", "Four");
```

```
svg.append("text")
```

```
.attr("x", legendXpropW*width + 10)
```

```
.attr("y", 0*gapLegendElements + legendYpropH*height + 5)
```

```
.attr("font-size", xAxisLabelFontSize)
```

```
.attr("font-family", xAxisLabelFont)
```

```
.text(labelLegend2);
```

```
//Group 1
```

```
svg.append("circle")
```

```
.attr("cx", legendXpropW*width)
```

```
.attr("cy", 1*gapLegendElements + legendYpropH*height)
```

```
.attr("r", circleSizeLegend)
```

```
.attr("class", "Three");
```

```
svg.append("text")
```

```
  .attr("x", legendXpropW*width + 10)
```

```
  .attr("y", 1*gapLegendElements + legendYpropH*height + 5)
```

```
  .attr("font-size", xAxisLabelFontSize)
```

```
  .attr("font-family", xAxisLabelFont)
```

```
  .text(labelLegend1);
```

```
//Group 2
```

```
svg.append("circle")
```

```
  .attr("cx", legendXpropW*width)
```

```
  .attr("cy", 2*gapLegendElements + legendYpropH*height)
```

```
.attr("r", circleSizeLegend)
```

```
.attr("class", "Two");
```

```
svg.append("text")
```

```
.attr("x", legendXpropW*width + 10)
```

```
.attr("y", 2*gapLegendElements + legendYpropH*height + 5)
```

```
.attr("font-size", xAxisLabelFontSize)
```

```
.attr("font-family", xAxisLabelFont)
```

```
.text(labelLegend0);
```

```
</script>
```
